# Supplementary material
Source: Springer Nature journal article supplement (https://www.springermedizin.de/resource/supplementary/12887_2009_276_MOESM4_ESM.pdf/9477674)

Better clinical outcomes and quality of life for HIV-infected children and their families

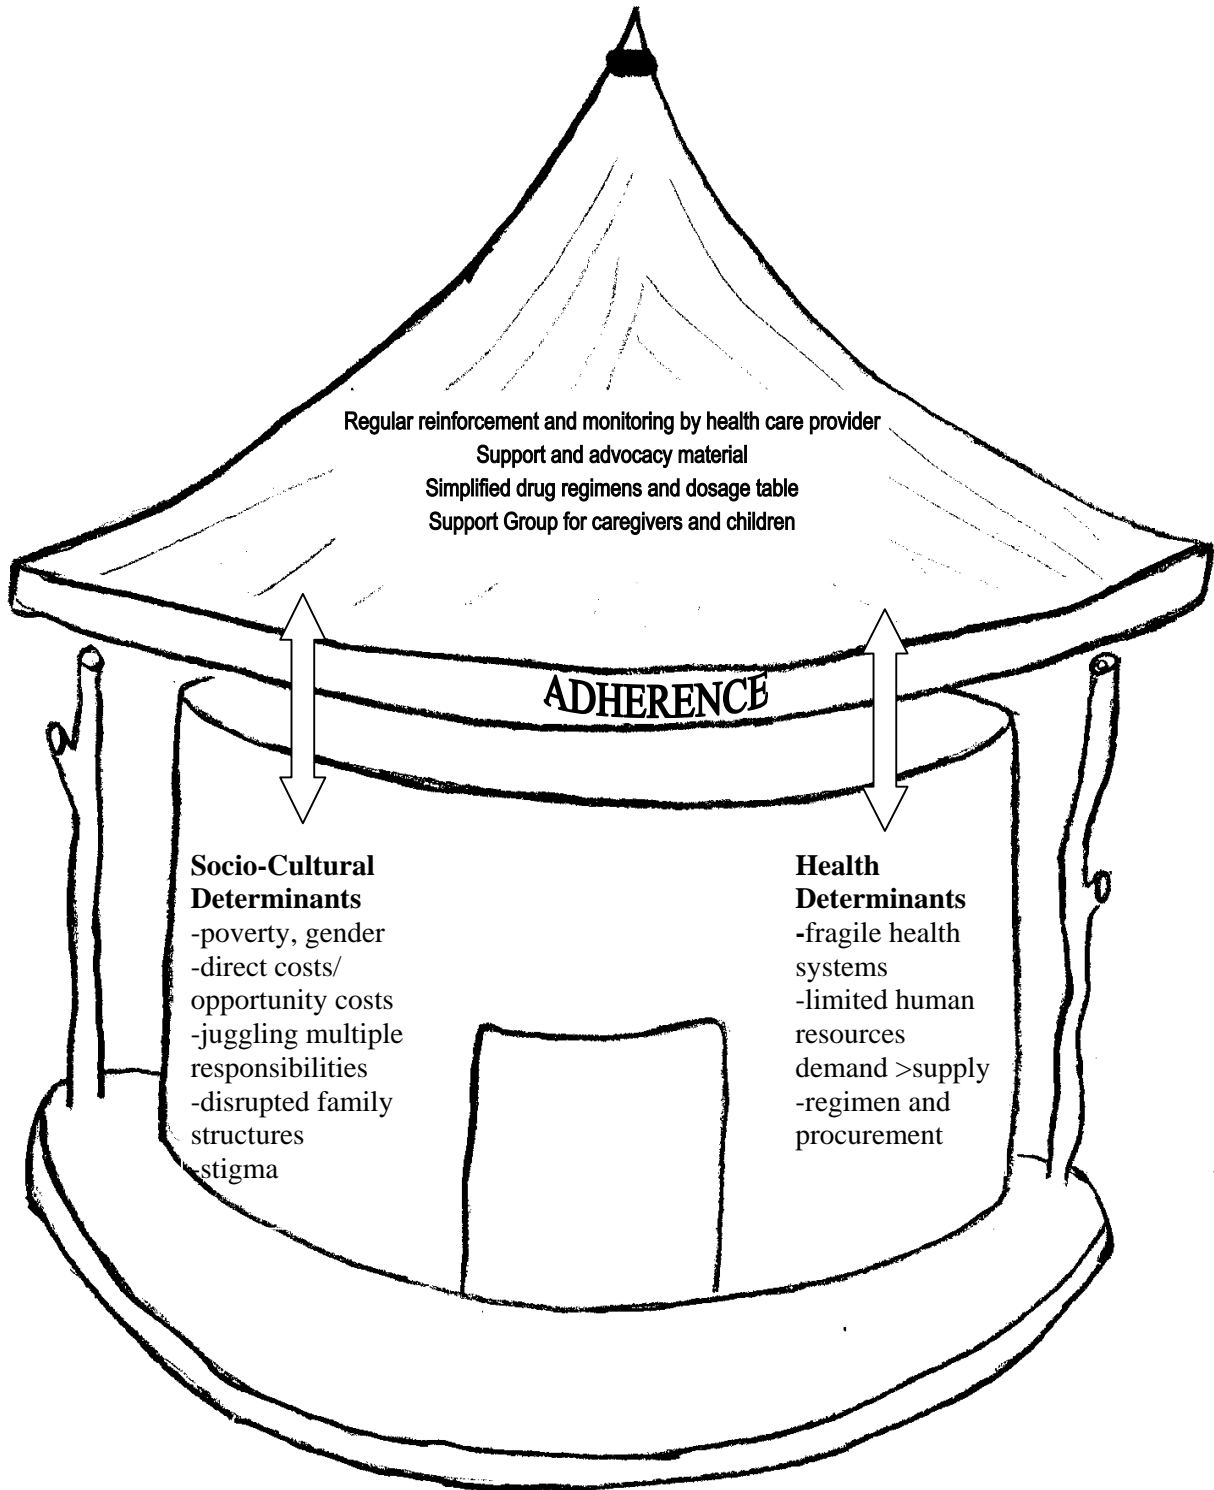

Supplement: MOESM4 [file 9477674]
